# Supplementary material
Source: MDPI journal article supplement (https://www.mdpi.com/2076-3263/13/11/320)
Supplement: s1 [file s1]

## **Supplementary Materials**

### Contents of this file

Figure S1: Example waveforms used to compute the RFs  
Figure S2: Stacked RF profile along the SB2 line  
Figure S3: Additional RF profiles for the San Bernardino basin  
Figure S4: Additional RF profiles for the Chino basin  
Figure S5: Additional RF profiles for the San Gabriel basin  
Table S1: Teleseismic events recorded by all stations  
Table S2: Number of stations that recorded events and produced RFs

### Additional Supporting Information (files uploaded separately)

1. Receiver function SAC files
2. Velocities used in the depth conversion
3. Scripts used for the depth conversion
4. Time and depth results in text files

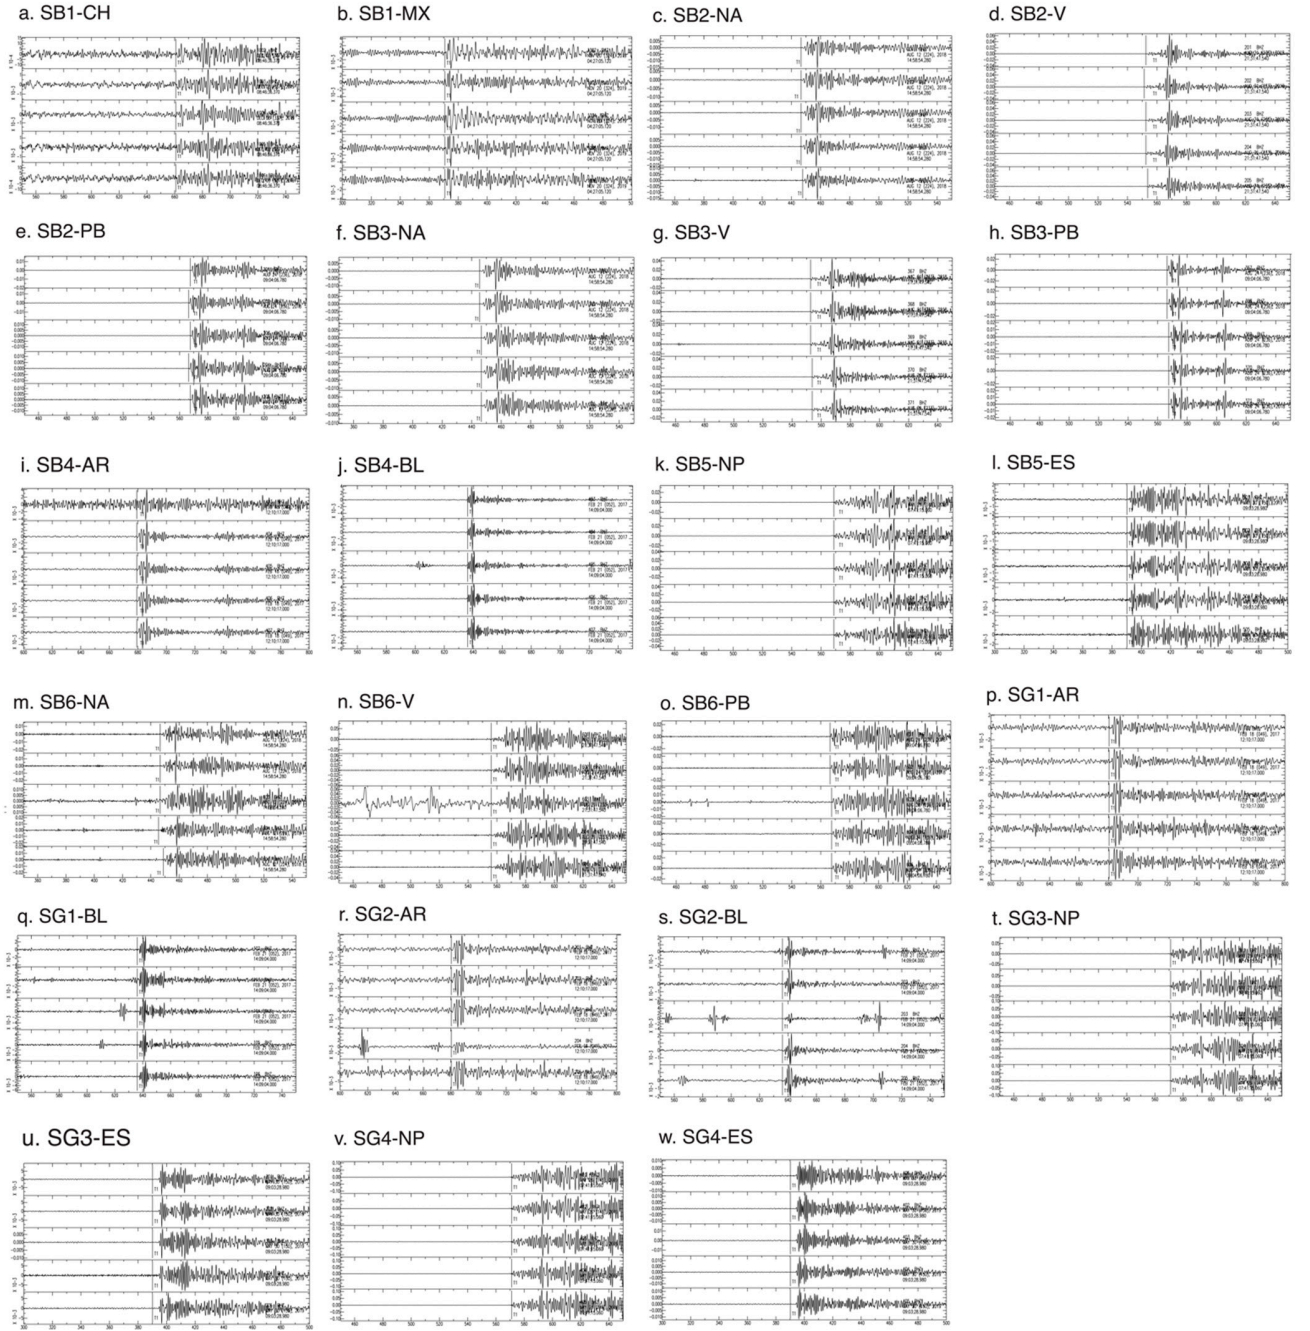

**Figure S1.** Each plot in this figure shows Z-component waveforms for five stations along each line for specific events that were used in the RF computations shown in this paper. The T1 markers represent the P arrivals.

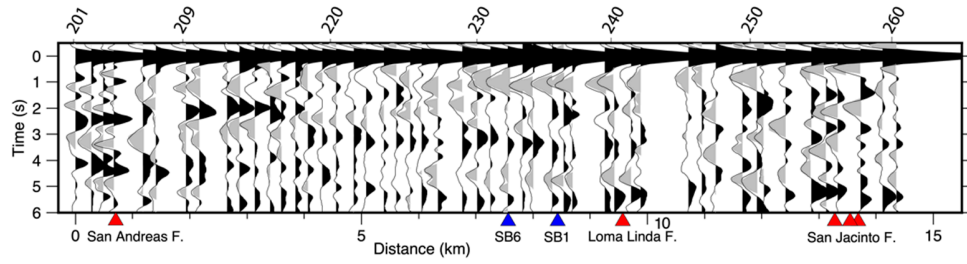

**Figure S2.** Stacked RFs along the SB2 line for three 2018 events (marked with \* in Table S1) with back azimuths ranging from 100 to 120 and epicentral distances ranging from 40° to 65°. Two of the three single-event RF profiles are shown in Figure S3 (c and e).

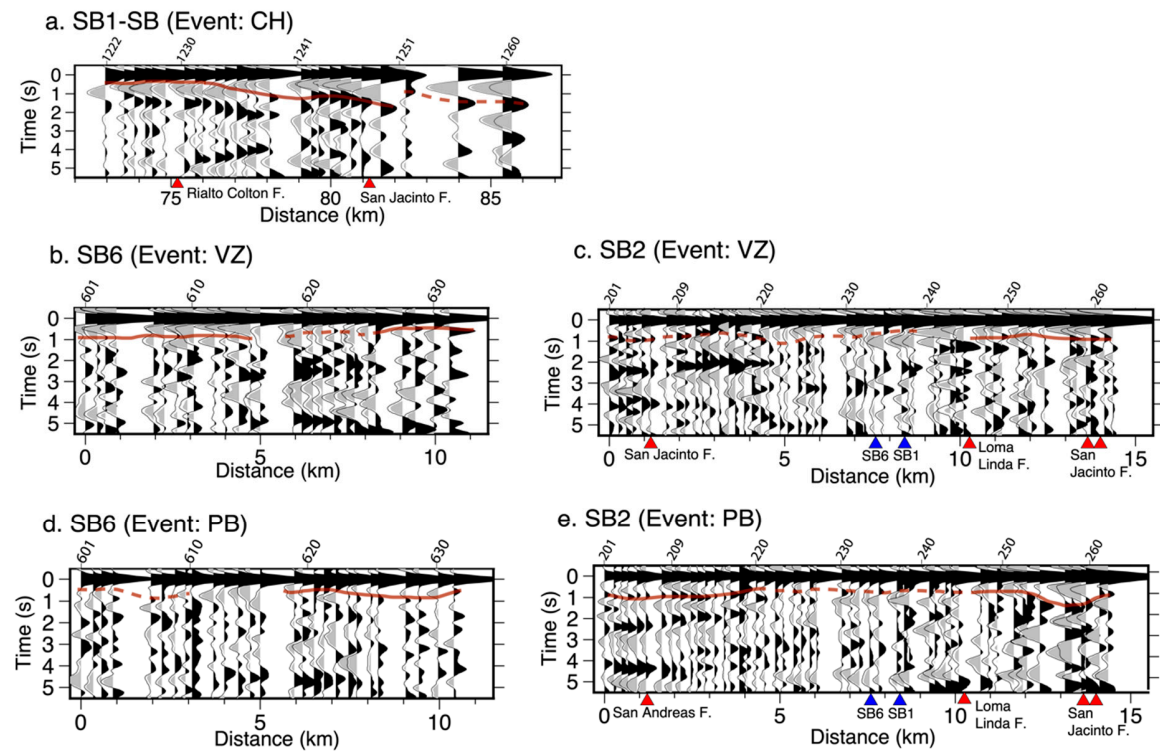

**Figure S3.** 3 Hz Receiver function profiles along the seismic lines in the San Bernardino basin for multiple events. The sediment–basement interface is marked with the brown line in the profiles.

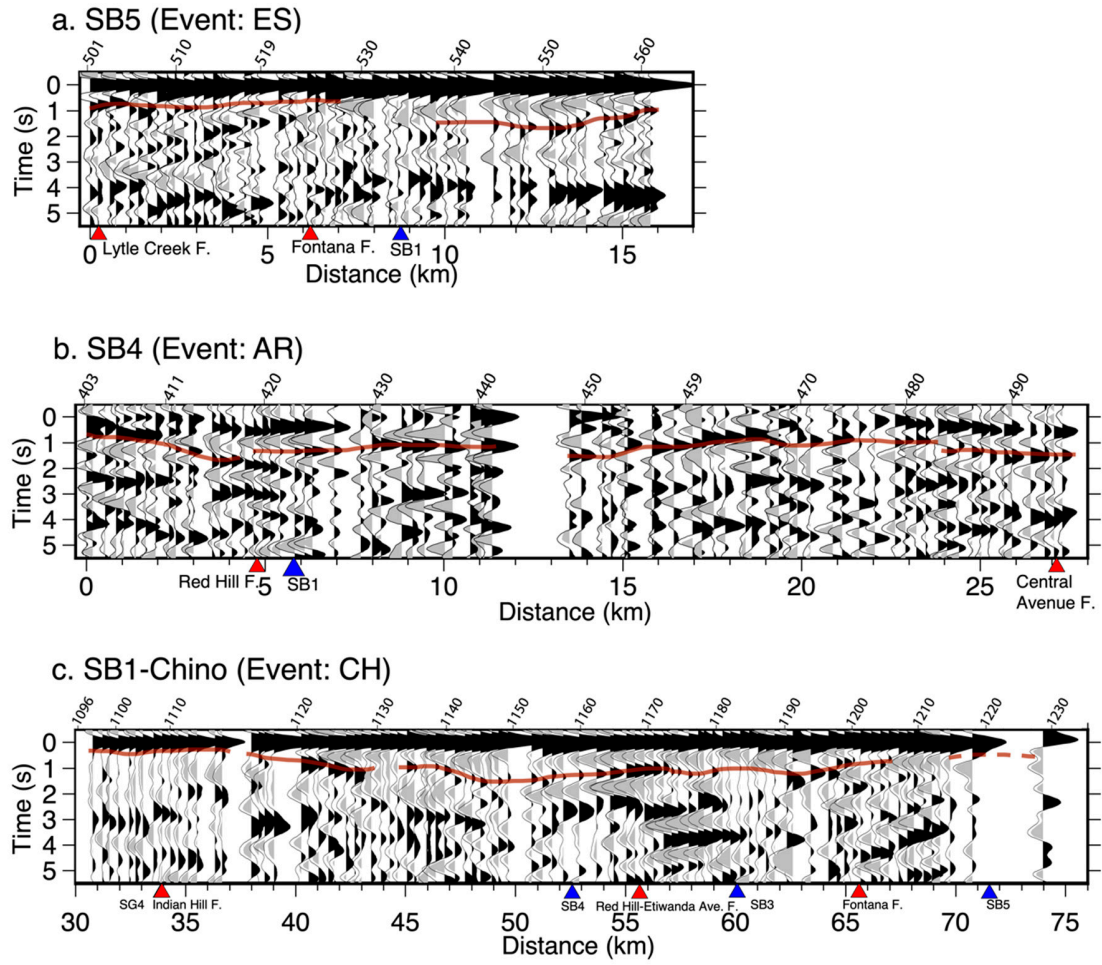

**Figure S4.** 3 Hz Receiver function profiles along the seismic lines in the Chino basin for multiple events. The sediment–basement interface is marked with the brown line in the profiles.



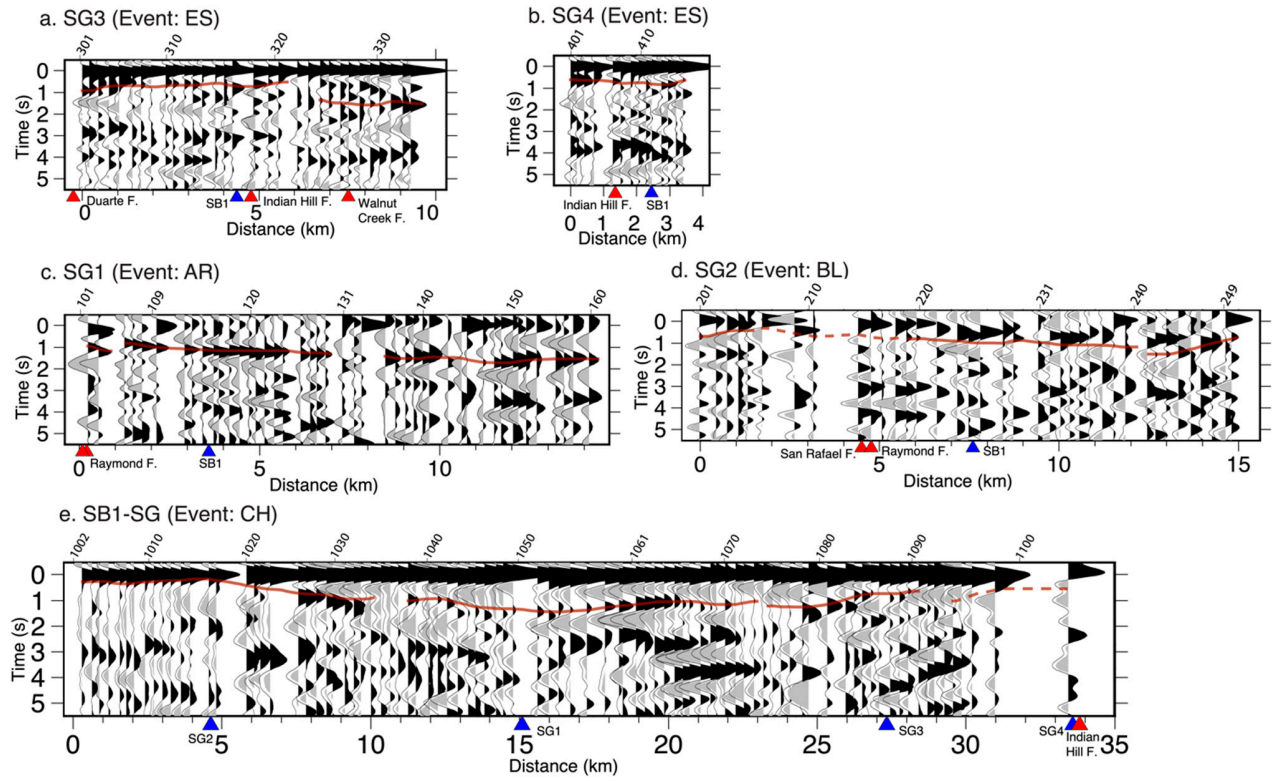

**Figure S5.** 3 Hz Receiver function profiles along the seismic lines in the San Gabriel basin for multiple events. The sediment–basement interface is marked with the brown line in the profiles.

**Table S1:** Teleseismic earthquakes with magnitudes greater than 5.9 recorded by different lines in the seismic array.

| Event Date<br>yy/mm/dd | Event Time<br>hh:mm:ss | Latitude | Longitude | Depth<br>(Km) | Magnitude | Back-<br>Azimuth<br>(°) | Distance<br>(°) |
|------------------------|------------------------|----------|-----------|---------------|-----------|-------------------------|-----------------|
| 17/03/11               | 17:10:38.67            | -30.5181 | -177.5201 | 22            | 5.6       | 228.1432                | 85.2727         |
| 17/03/07               | 23:38:22.52            | -15.0230 | 168.1626  | 8             | 5.6       | 248.479                 | 85.3265         |
| 17/03/07               | 16:08:19.04            | 41.5149  | 141.9022  | 56            | 5.7       | 309.9548                | 74.8119         |
| 17/03/05               | 12:22:16.42            | -55.1821 | -129.1773 | 10            | 5.6       | 186.2788                | 89.4942         |
| 17/02/28               | 17:35:40.37            | -44.7930 | -80.8972  | 10            | 5.6       | 154.3645                | 85.5778         |
| 17/02/28               | 7:49:02.86             | 37.5573  | 141.3377  | 47.36         | 5.7       | 306.7735                | 77.318          |
| 17/02/24               | 23:46:45.37            | -17.9678 | -178.4533 | 581.4         | 5.9       | 237.9172                | 77.2932         |
| 17/02/24               | 17:28:44.87            | -23.2601 | -178.8033 | 414.89        | 6.9       | 234.2063                | 81.108          |
| 17/02/21               | 14:09:04.32            | -19.2814 | -63.9047  | 595.98        | 6.5       | 127.1219                | 74.1145         |
| 17/02/18               | 12:10:17.97            | -23.8613 | -66.6592  | 222           | 6.3       | 132.29                  | 75.6783         |
| 17/02/03               | 19:54:22.14            | 15.0833  | -60.5290  | 39.27         | 5.8       | 95.218                  | 55.036          |
| 17/01/30               | 23:35:24.00            | -14.7729 | 167.1710  | 79            | 5.9       | 249.2555                | 85.9441         |
| 17/01/29               | 14:59:51.98            | -30.0938 | -177.4531 | 18            | 5.9       | 228.4063                | 84.9358         |
| *18/08/24              | 9:04:06.78             | -11.0424 | -70.8169  | 609.48        | 7.1       | 126.2461                | 63.5841         |
| 18/08/23               | 3:35:15.95             | 51.5106  | -177.8810 | 43.91         | 6         | 311.1181                | 45.74           |
| 18/08/21               | 22:32:26.85            | -16.0248 | 168.1307  | 11.14         | 6.5       | 247.7005                | 85.9513         |
| *18/08/21              | 21:31:47.54            | 10.7791  | -62.9070  | 146.18        | 7.3       | 101.1272                | 55.395          |
| 18/08/19               | 4:28:58.70             | -16.9783 | -178.0332 | 415.6         | 6.8       | 238.3851                | 76.3332         |
| 18/08/19               | 00:19:40.67            | -18.1125 | -178.1536 | 600           | 8.2       | 237.6109                | 77.1803         |
| 18/08/18               | 19:39:07.16            | 8.8013   | -77.2503  | 10            | 5.6       | 114.2287                | 45.2463         |
| *18/08/17              | 23:22:24.90            | 8.7694   | -83.1531  | 15            | 6.1       | 119.9503                | 40.9094         |

|          |             |          |           |        |      |          |         |
|----------|-------------|----------|-----------|--------|------|----------|---------|
| 18/08/16 | 18:22:53.36 | 23.4226  | 143.3187  | 20     | 6.3  | 293.953  | 83.7729 |
| 18/08/15 | 21:56:54.36 | 51.4215  | -178.0516 | 20     | 6.6  | 310.9987 | 45.8496 |
| 18/08/12 | 14:58:54.28 | 69.5619  | -145.2998 | 2.2    | 6.3  | 345.0952 | 38.4927 |
| 18/08/10 | 18:12:07.13 | 48.4526  | 154.9250  | 28.00  | 5.90 | 312.00   | 63.44   |
| 18/08/09 | 19:21:51.97 | 13.5687  | -91.2332  | 18     | 5.6  | 123.47   | 31.89   |
| 18/08/07 | 13:57:09.83 | 74.6458  | 8.4549    | 10     | 5.7  | 13.54    | 65.98   |
| 18/07/28 | 9:28:17.40  | -30.0601 | -177.4508 | 18     | 5.7  | 228.43   | 84.91   |
| 19/06/04 | 4:39:17.50  | 29.0623  | 139.2932  | 430.3  | 6.3  | 300.6678 | 83.5222 |
| 19/06/02 | 10:36:29.65 | -21.2091 | -173.9076 | 10     | 6    | 232.482  | 76.4305 |
| 19/05/30 | 15:38:01.45 | -21.7541 | -176.3171 | 177.85 | 6    | 233.7015 | 78.4089 |
| 19/05/30 | 9:03:28.97  | 13.1462  | -89.3663  | 25     | 6.6  | 121.6811 | 33.4905 |
| 19/05/27 | 9:52:21.78  | 58.8565  | -152.3581 | 64     | 5.7  | 328.041  | 33.4715 |
| 19/05/26 | 7:41:15.05  | -5.8132  | -75.2775  | 122.4  | 8    | 125.9287 | 56.7737 |
| 19/05/25 | 10:31:10.82 | -18.9971 | 169.0424  | 145    | 5.7  | 244.8168 | 87.0513 |
| 19/05/23 | 15:02:18.59 | -21.6535 | 169.7938  | 19     | 5.7  | 242.2926 | 88.1105 |
| 19/05/23 | 8:45:17.74  | 51.3078  | -178.2387 | 30     | 6.1  | 310.8465 | 45.9711 |
| 19/05/20 | 11:18:32.75 | -31.4861 | -69.8663  | 102.26 | 5.6  | 139.5559 | 79.6044 |
| 19/05/19 | 12:32:9.15  | -21.6619 | 169.7779  | 20     | 6.3  | 242.2951 | 88.1273 |
| 19/05/16 | 22:52:43.93 | -4.5883  | -105.7309 | 10     | 5.8  | 160.5889 | 40.3051 |
| 19/05/16 | 16:22:16.60 | 12.6286  | -87.8430  | 62.86  | 5.9  | 120.5357 | 34.9246 |
| 19/05/12 | 19:24:50.39 | 8.6227   | -82.8326  | 19     | 6    | 119.7806 | 41.2399 |
| 19/12/10 | 8:40:42.59  | -20.9041 | 168.5652  | 10     | 5.6  | 243.5835 | 88.562  |
| 19/11/30 | 7:44:25.04  | 13.9284  | -91.8586  | 47.61  | 5.6  | 123.7971 | 31.2103 |
| 19/11/09 | 11:24:30.63 | -20.2924 | -176.3942 | 255    | 5.6  | 234.824  | 77.452  |
| 19/11/19 | 23:10:40.57 | -33.6399 | -66.8723  | 10     | 5.7  | 138.9848 | 82.8731 |
| 19/11/17 | 12:13:27.79 | -20.8071 | -177.8316 | 499    | 5.8  | 235.3913 | 78.7819 |
| 19/12/10 | 17:05:02.66 | 30.7178  | 141.7364  | 14.44  | 5.9  | 300.811  | 80.8383 |
| 19/12/06 | 13:04:46.93 | -15.2838 | -175.1193 | 10     | 6    | 237.6853 | 73.1354 |
| 19/12/04 | 20:10:03.59 | -19.0677 | 169.5748  | 266    | 6    | 244.4531 | 86.6953 |
| 19/12/03 | 8:46:36.37  | -18.5597 | -70.6504  | 32.44  | 6    | 131.5577 | 69.2598 |
| 19/11/11 | 23:03:28.05 | -18.8857 | -175.3598 | 10     | 6.1  | 235.1648 | 75.7788 |
| 19/11/24 | 5:40:1.05   | 51.3809  | -175.5108 | 20     | 6.3  | 310.8987 | 44.2592 |
| 19/11/20 | 8:26:07.54  | 53.1633  | 153.6852  | 486.81 | 6.3  | 317.2483 | 62.4401 |
| 19/11/20 | 4:27:05.12  | 13.8855  | -93.2133  | 14.16  | 6.3  | 125.6884 | 30.3177 |

**Table S2:** Number of stations recording the teleseismic events used in this study and number of stations that produced useful RFs from those events.

| Line | Number of stations used in RF computation | Number of stations producing useful RFs |             |           |  |
|------|-------------------------------------------|-----------------------------------------|-------------|-----------|--|
|      |                                           | Argentina                               | Bolivia     |           |  |
| SB4  | 96                                        | 80                                      | 78          |           |  |
| SG1  | 60                                        | 41                                      | 41          |           |  |
| SG2  | 50                                        | 37                                      | 28          |           |  |
|      |                                           | North Alaska                            | Peru Brazil | Venezuela |  |
| SB2  | 61                                        | 48                                      | 51          | 50        |  |
| SB3  | 87                                        | 70                                      | 16          | 15        |  |
| SB6  | 33                                        | 28                                      | 27          | 27        |  |
|      |                                           | Northern Peru                           | El Salvador |           |  |
| SB5  | 62                                        | 52                                      | 52          |           |  |
| SG3  | 34                                        | 33                                      | 33          |           |  |
| SG4  | 15                                        | 14                                      | 14          |           |  |
|      |                                           | Mexico                                  | Chile       |           |  |
| SB1  | 260                                       | 205                                     | 168         |           |  |
